# Supplementary material
Source: publisher figshare collection journal article supplement (https://aacr.figshare.com/ndownloader/files/42659841)
Supplement: Supplementary file 1 [file 42659841]

|           | Biomarker | 96 hour fixation:<br>Block 1 | 96 hour fixation:<br>Block 2 | 48 hour fixation |
|-----------|-----------|------------------------------|------------------------------|------------------|
| Patient 1 | AREG      | 64.9                         | 64.2                         | 59.5             |
|           | EREG      | 60.1                         | 64.6                         | 56.3             |
| Patient 2 | AREG      | 81.3                         | 90.6                         | 41.3             |
|           | EREG      | 96.1                         | 97.4                         | 77.8             |
| Patient 3 | AREG      | 46.6                         | 44.4                         | 31.2             |
|           | EREG      | 84.2                         | 87.8                         | 73.4             |
| Patient 4 | AREG      | 15.9                         | 20.7                         | 16.8             |
|           | EREG      | 0.2                          | 0.1                          | 0.5              |

**Supplementary Table S2** Pre-study assessment of the effect of variation in tissue fixation time on AREG/EREG tumor cell percentage positivity.

AREG and EREG scores (expressed as the percentage of tumor cells in the tumor area staining biomarker positive) for three formalin-fixed, paraffin-embedded tumor blocks from different regions of the same tumor in four individual patients. Two blocks were taken from tumor tissue fixed for 96 hours, and one block from tumor tissue fixed for the standard fixation time of 48 hours.
